# Supplementary material for: 1,4-Dialkyl-1,4-diazabutadienes: their reactions with aluminum and indium halides
Source: Royal Society of Chemistry journal article supplement (doi:10.1039/c3nj01226c), 2013-11-05
Supplement: c3nj01226c.pdf [file c3nj01226c.pdf]

## Supplementary material:

### 1,4-Dialkyl-1,4-diazabutadienes, their reactions with aluminum and indium halides.

H. Rojas-Sáenz, G. V. Suárez-Moreno, I. Ramos-García, A. M. Duarte-Hernández, E. Mijangos, A. Peña-Hueso, R. Contreras and A. Flores-Parra\*

*Department of Chemistry, Cinvestav, AP 14-740, CP 07000, México DF.  
e-mail: aflores@cinvestav.mx*

#### INDEX:

- S1 Discussion of the X-ray diffraction analyses of (R) 1-chloro-butan-2-amine hydrochloride.
- S2 Macromolecular helix arrangement in the crystal of compound **2**.
- S3 Theoretical conformational analysis of 1,4-dialkyl-1,4-diazabutadienes **1-4**.
- S4 X-Ray diffraction structure of compound **10**.
- S5 Cell packing representation of compound **14** with  $[I_3]^-$  as anion.
- S6 Optimized structures of compounds: **5, 17, 18, 20-22**.
- S7 Representation of the electrostatic potentials of the indium compounds **16-18** and of the ligand **3** coordinated to one and two  $InCl_3$  molecules.

## S1: X-Ray diffraction analysis of (R)-2-chloro-butanamine hydrochloride

The (R)-2-chloro-butanamine hydrochloride was crystallized from  $\text{CHCl}_3$  and the X-ray diffraction structure obtained. The unit cell contains only one ionic pair, Fig 1a. The chloride forms six hydrogen bonds, three with C-H protons ( $\text{CH}\cdots\text{Cl}$  distances 3.05, 2.89 and 2.90 Å); two with the N-H of two molecules, the five hydrogen bonds are almost in the same plane ( $\text{NH}\cdots\text{Cl}$  distances 2.37 and 2.35 Å), Fig. 1b. The ionic pair forms a planar macromolecular arrangement by  $\text{Cl}\cdots\text{H}$  hydrogen bonds, Fig. 2. Planes are connected between them by perpendicular strong  $\text{N-H}\cdots\text{Cl}$  (2.28 Å). Quite interesting is to find that the  $\text{CH}_2\text{-Cl}$  chlorine atom does not have any interaction with other protons.

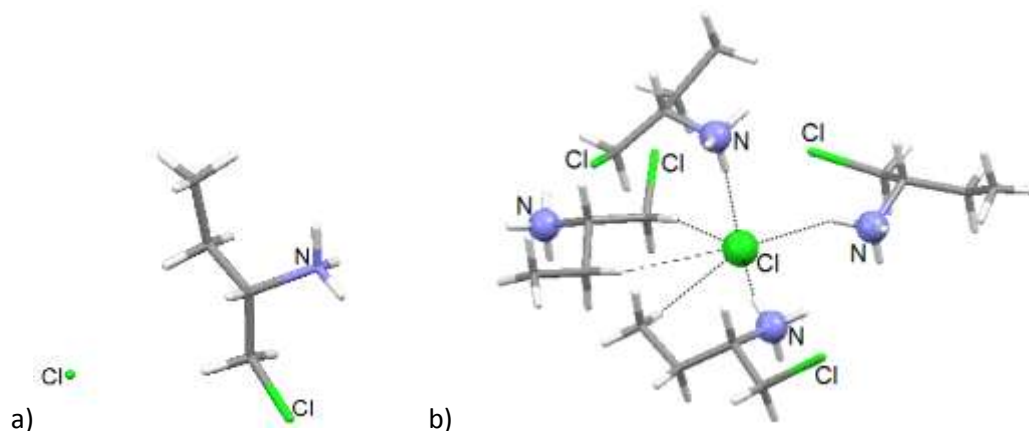

Fig.1. a) Structure of the (S)-2-chloro-butanamine hydrochloride found in the solid state. b) Hydrogen bonds of chloride in the cell of (S)-2-chloro-butanamine hydrochloride

Table of selected bond length and angles of (R) (-)-1-chloro-butan-2-amine hydrochloride

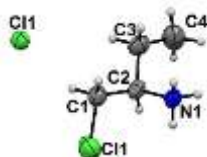

|              |          |             |          |
|--------------|----------|-------------|----------|
| Bond lengths |          | C1-C2       | 1.510(2) |
| C1-C2        | 1.510(2) | Bond angles |          |
| C1-Cl1       | 1.785(2) | C2-C1-Cl1   | 112.4(1) |
| C2-C3        | 1.522(2) | N1-C2-C1    | 109.1(1) |
| C3-C4        | 1.522(3) | N1-C2-C3    | 109.9(1) |
| C2-N1        | 1.496(2) | C1-C2-C3    | 109.9(1) |

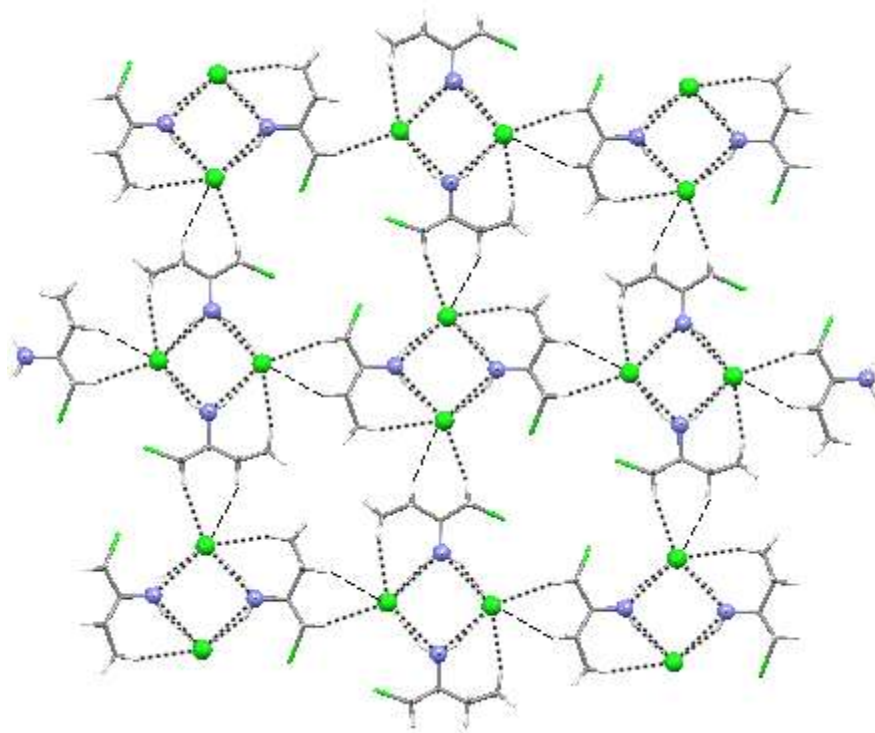

The ionic pair of the (S)-2-chloro-butanamine hydrochloride forms a planar macromolecular array by the chloride hydrogen bonds, chloride and nitrogen atoms are represented by spheres.

### S2 Macromolecular helix arrangement in the crystal of compound 2:

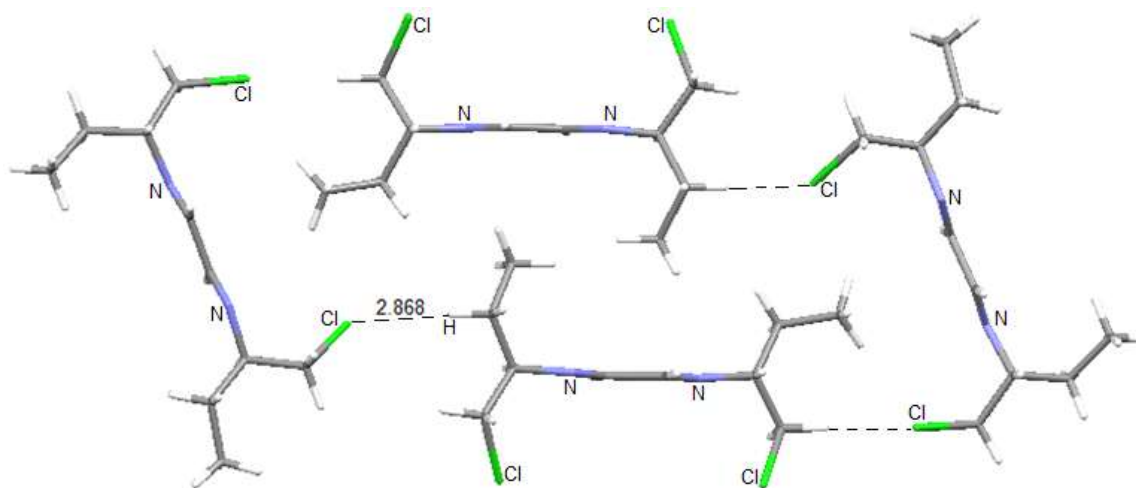

. Interactions are due to the Cl...H-C hydrogen bonds (2.868 Å). Diazabutadienes are arranged in a helix, with a path of four molecules. The helix axis is perpendicular to the paper plane.

### S3 Theoretical conformational analysis of 1,4-dialkyl-1,4-diazabutadienes 1-4

Six planar conformers (A-F) can be described for compounds **1-4**, Scheme 4. Diazabutadienes A, B and C differ by the nitrogen configuration; their interconversion needs only nitrogen inversion. Same situation exists for isomers D-F. Rotation of C2-C2' bond transforms A, B and C into conformers D, E and F, respectively.

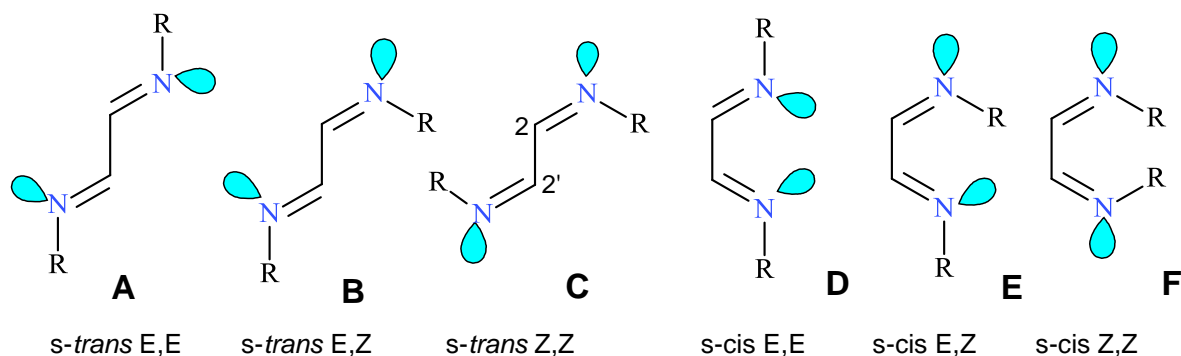

Scheme 4. Six planar conformers can be depicted for diazabutadienes **1-4**.

It was relevant to know about the energy difference between conformers. Their free energy is related to the steric effects of the tertiary or quaternary N-substituent. The different conformers were calculated by DFT and the hybrid method B3LYP/6-31+G(d,p). In the four molecules **1-4**, isomers A were the most stables. The energy difference (kJ/mol) between A considered as 0.0 and their conformers were calculated, Table. The increase in energy is related to the number of Z relationships: A < B < C. The *cis* conformers (D-F) of compounds **1-3** bearing tertiary N-C carbon atoms are 24.4 – 27.1 kJ/mol less stable than A conformers, whereas the *tert*butyl groups in compound **4** makes isomer D less stable than A by 30.4 kJ/mol. The repulsion of the nitrogen lone pairs in isomer D is also a destabilization factor. In all cases, the calculated energy of the C2-C2' rotational bond barrier for **1-4** is 37.0 kJ/mol. The steric tension in some of the *cis* conformers did not allow getting the planar conformation, these cases are marked with an asterisk. Calculated molecules are in Figure.

Table Energy difference ( $\Delta G^0$ , kJ/mol) between conformers A and B-F.

|          | <b>A</b> | <b>B</b> | <b>C</b>     | <b>D</b> | <b>E</b>     | <b>F</b>      |
|----------|----------|----------|--------------|----------|--------------|---------------|
| <b>1</b> | 0.0      | 14.9     | 37.9         | 27.1     | 35.8         | --            |
| <b>2</b> | 0.0      | 19.0     | 45.6         | 24.4     | <u>41.2*</u> | 96.2          |
| <b>3</b> | 0.0      | 20.3     | <u>44.4*</u> | 25.6     | <u>75.5*</u> | 91.5          |
| <b>4</b> | 0.0      | 39.2     | 70.3         | 30.4     | <u>53.4*</u> | <u>179.1*</u> |

(\*) conformers where the steric effect did not allow to get planar diazabutadienes

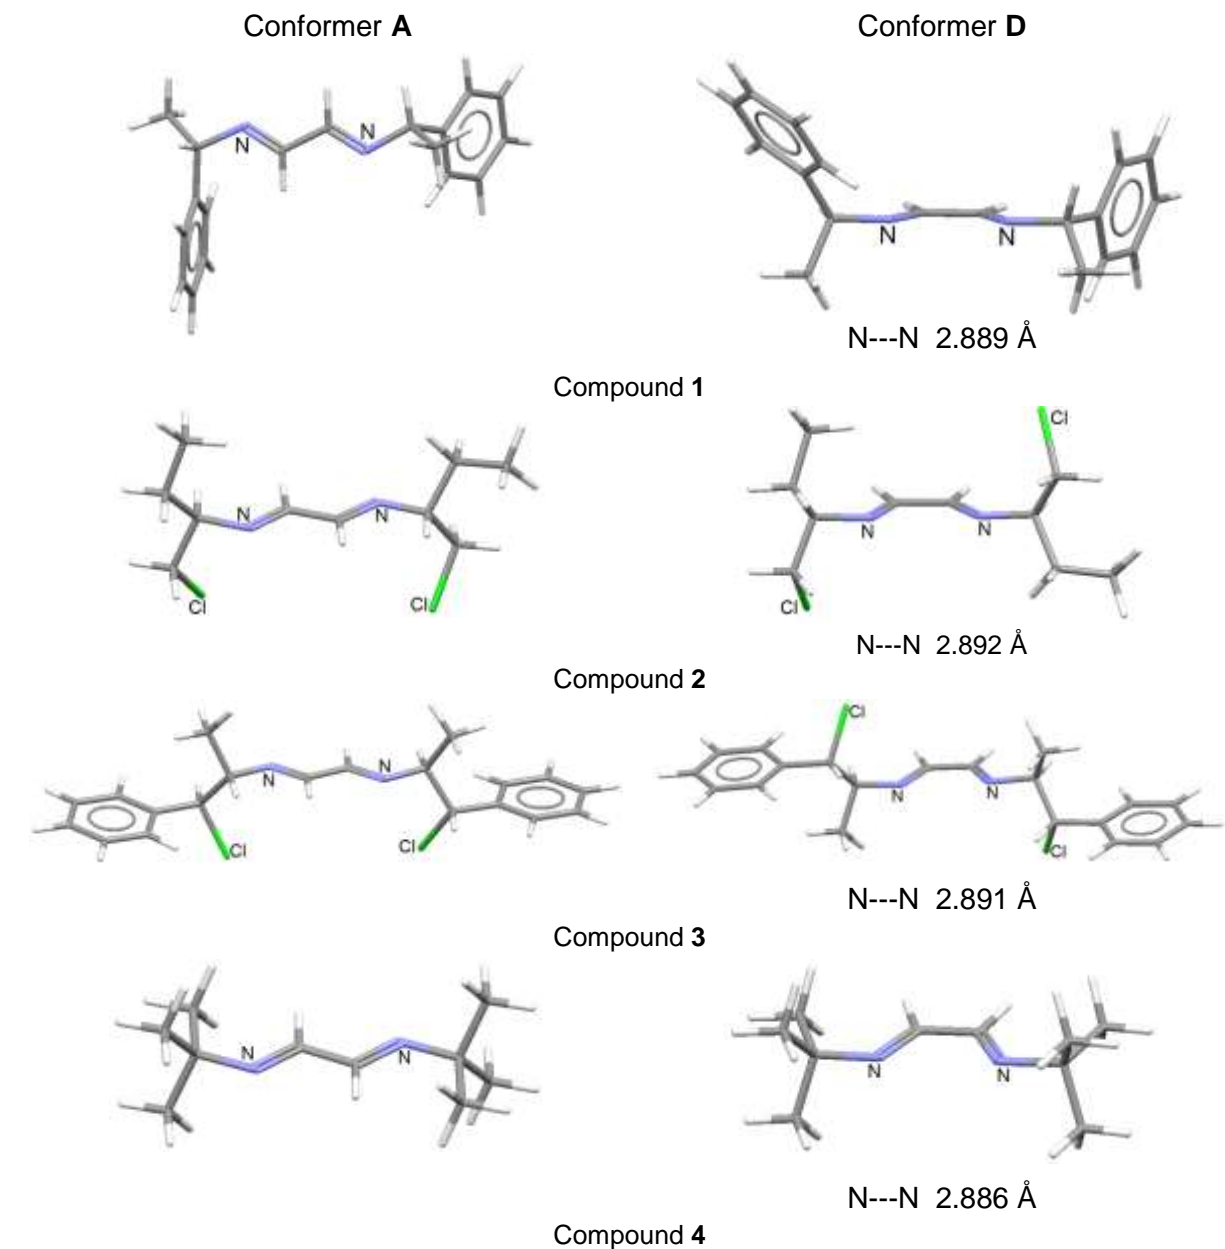

**Compound 4**  
Representation of calculated A and D conformers for compounds **1-4**. The N—N distances in cis compounds are shown.

#### S4 X-Ray diffraction structure of compound 10

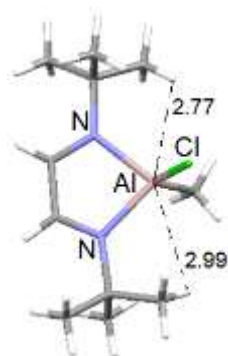

Anagostic interactions H...Al are shown.

#### S5 cell packing representation of compound 14 with $[I_3]^-$ as anion

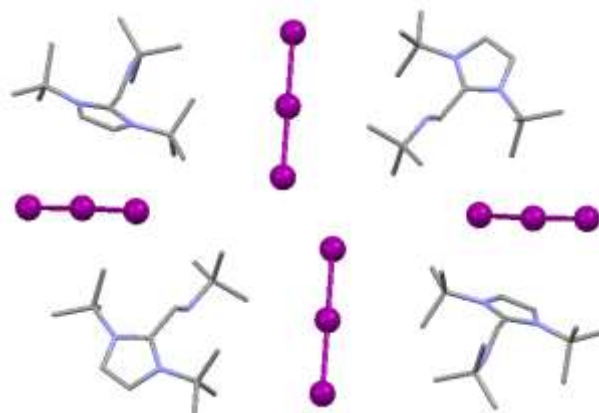

Ball and stick representation of the  $[I_3]^-$  anions in the crystal of imidazolium **14**.  $[I_3]^-$  Bond lengths: I1-I2, 2.962(2); I2-I3, 2.892(2); and angle: I3-I2-I1, 177.9(1).

### S6 Optimized structures of compounds 5, 17, 18, 20-22

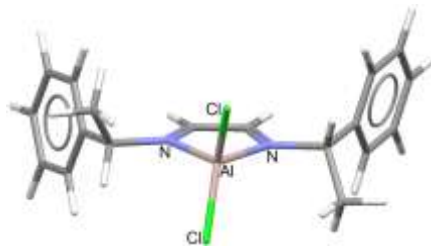

Calculated structure of compound 5

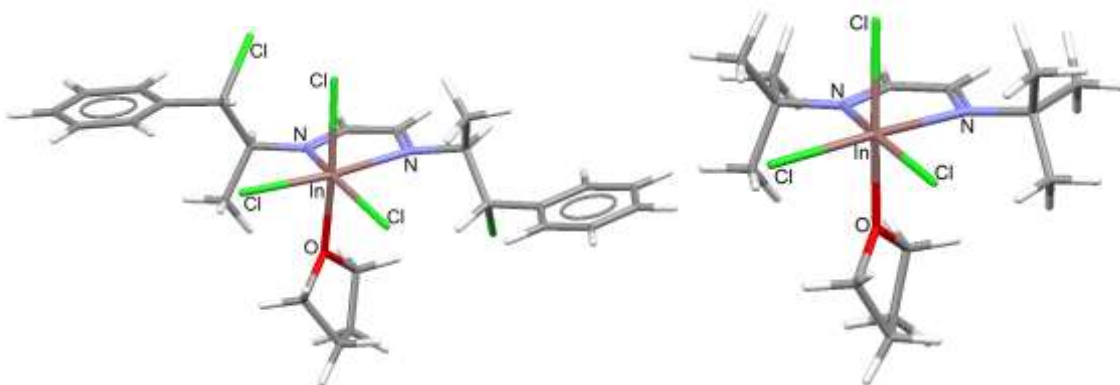

Calculated structures of compounds 17 and 18.

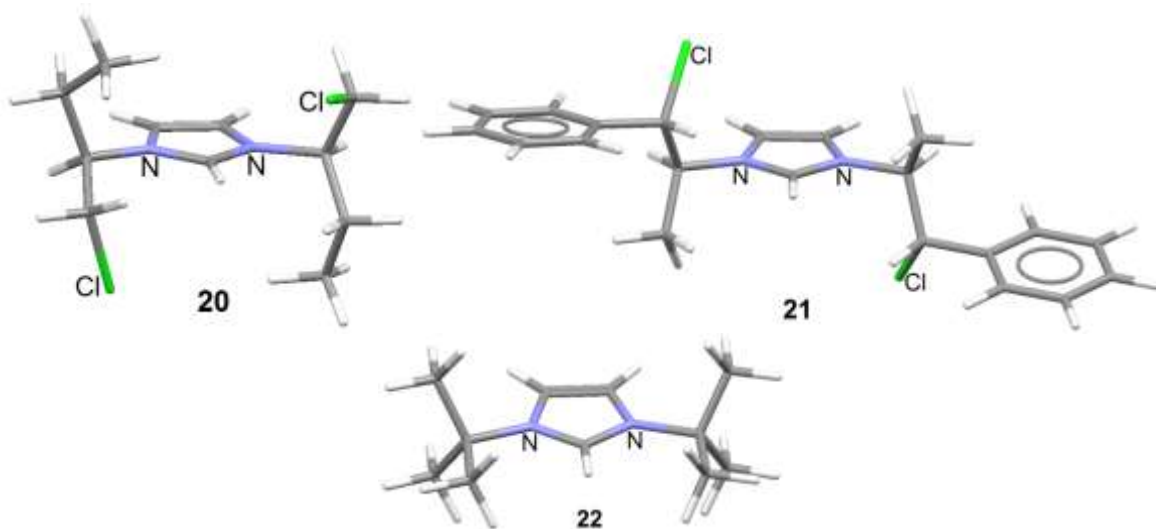

Calculated minimum energy conformers of compounds 20 and 21.

### S7 Calculated electrostatic potential for indium compounds

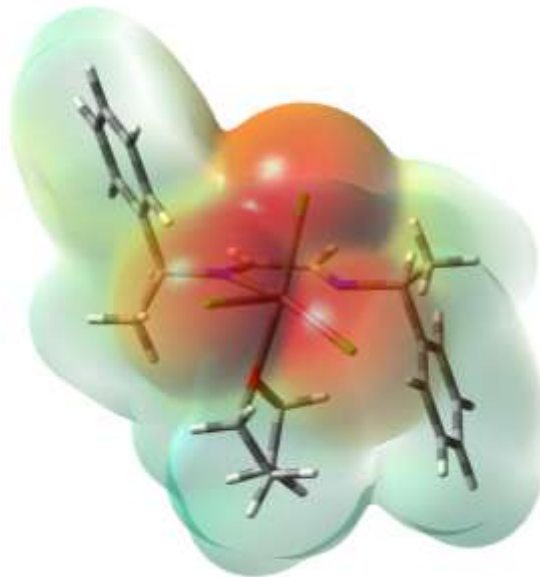

Calculated electrostatic potential for indium compound **15**.

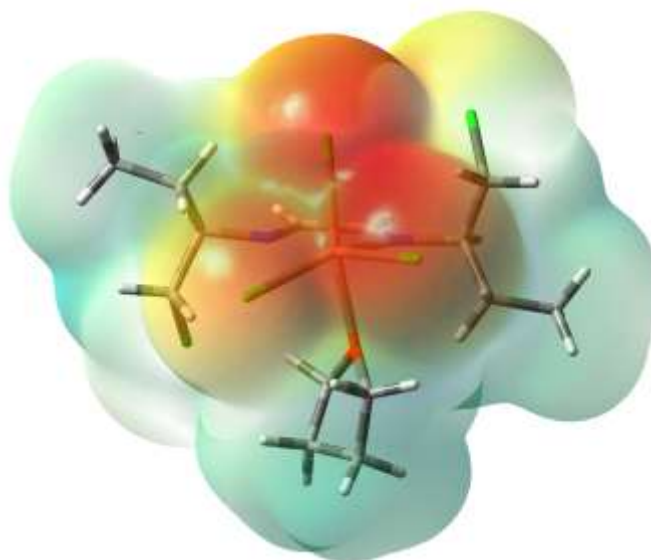

Calculated electrostatic potential for indium compound **16**.



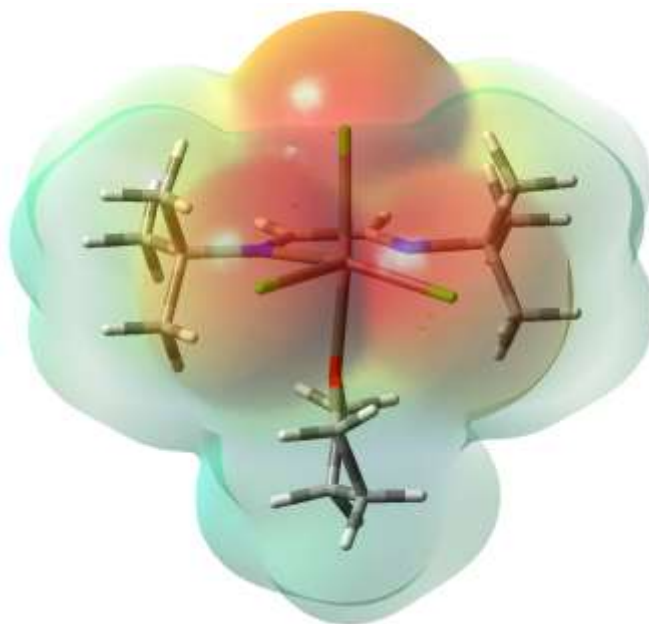

Calculated electrostatic potential for indium compound **18**.

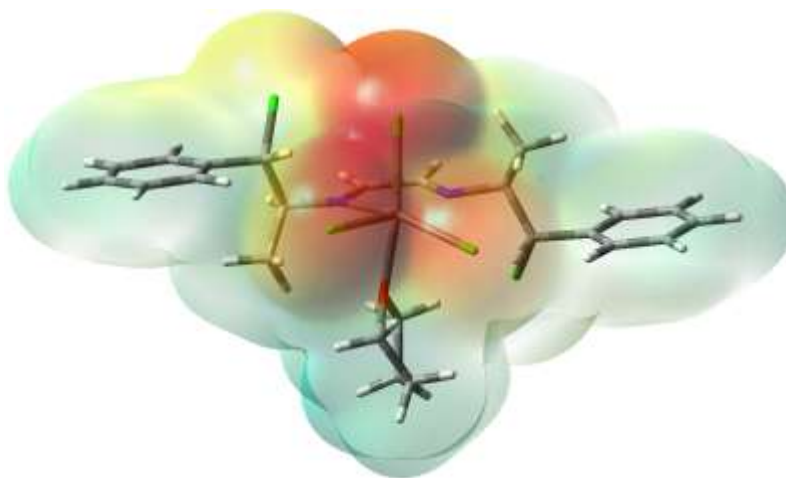

Calculated electrostatic potential for the indium compound **17**.

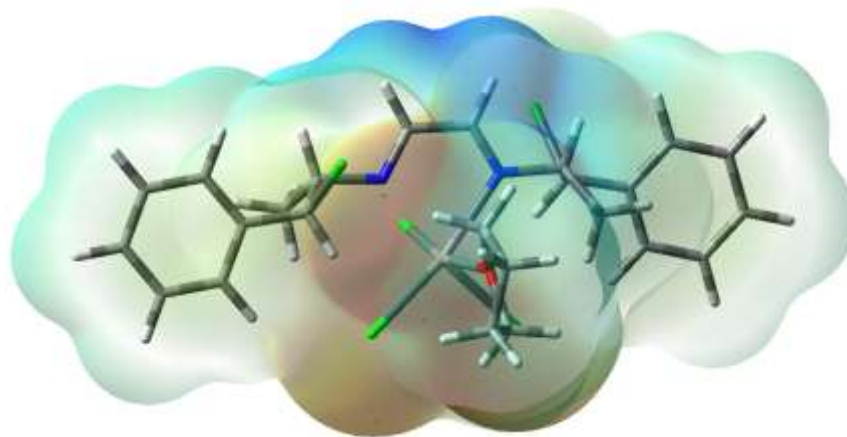

Calculated electrostatic potential for indium compound **17**. The blue area belongs to the butadiene protons.

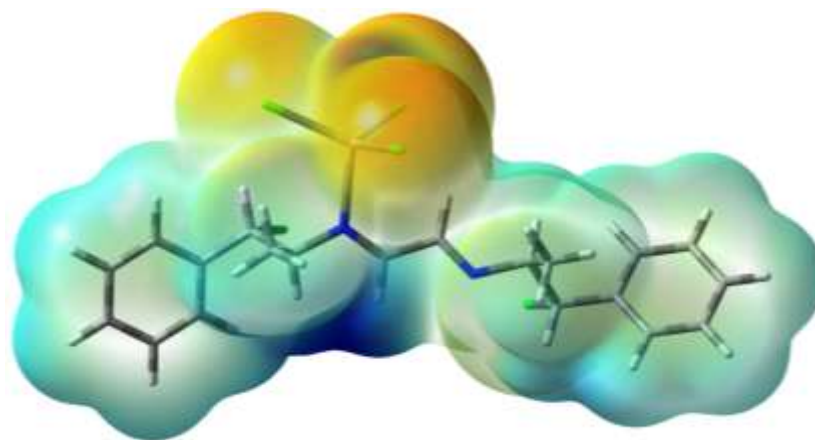

Calculated electrostatic potential for ligand **3** coordinated to one InCl<sub>3</sub>.

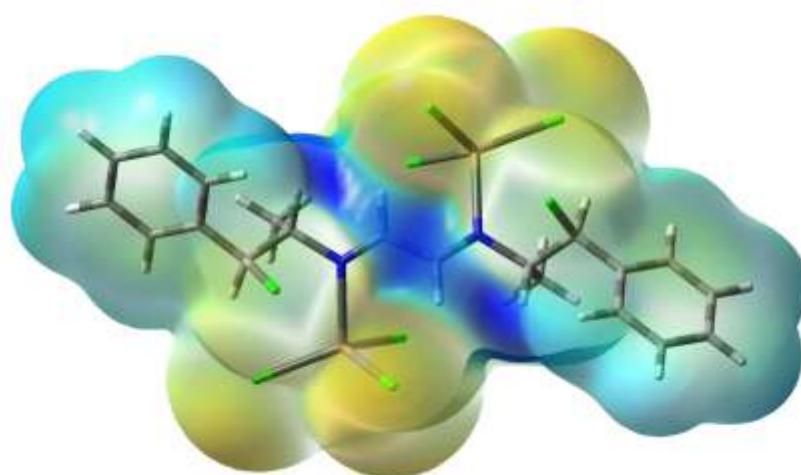

Calculated electrostatic potential for ligand **3** coordinated to two InCl<sub>3</sub>
